# Supplementary material
Source: publisher figshare collection journal article supplement (https://acs.figshare.com/ndownloader/files/4622635)

# Mechanistic Studies on the Catalytic Asymmetric Mannich-type Reaction with Dihydroisoquinolines and Development of Oxidative Mannich-type Reaction Starting from Tetrahydroisoquinolines

*Christian Dubs,<sup>1</sup> Yoshitaka Hamashima,<sup>1</sup> Naoki Sasamoto,<sup>1</sup> Thomas M. Seidel,<sup>1</sup> Shoko Suzuki,<sup>1</sup>*

*Daisuke Hashizume,<sup>2</sup> and Mikiko Sodeoka\*<sup>1</sup>*

<sup>1</sup>Synthetic Organic Chemistry Laboratory, RIKEN, Hirosawa, Wako 351-0198, Japan, and

<sup>2</sup>Molecular Characterization Team, RIKEN, Hirosawa, Wako 351-0198, Japan.

sodeoka@riken.jp

## Supporting Information

|                                                                                                                                           |    |
|-------------------------------------------------------------------------------------------------------------------------------------------|----|
| (A) General                                                                                                                               | P2 |
| (B) X-Ray Crystal Structure Analysis of <b>2a</b>                                                                                         | P2 |
| (C) X-Ray Crystal Structure Analysis of <b>23</b>                                                                                         | P3 |
| (D) <sup>1</sup> H NMR spectra of the Pd complexes ( <b>1a</b> , <b>2a</b> , <b>3a</b> )                                                  | P4 |
| (E) <sup>1</sup> H NMR spectra of the new compounds ( <b>7j</b> , <b>18</b> , <b>19</b> , <b>21</b> , <b>22</b> , <b>23</b> , <b>24</b> ) | P7 |

## (A) General

**General:** NMR spectra were recorded at 400 MHz for  $^1\text{H}$  NMR and 100.4 MHz for  $^{13}\text{C}$  NMR, or at 300 MHz for  $^1\text{H}$ -NMR and 75.0 MHz for  $^{13}\text{C}$  NMR. Chemical shifts are reported downfield from TMS (= 0) for  $^1\text{H}$  NMR. For  $^{13}\text{C}$  NMR, chemical shifts are reported using the solvent signal as an internal reference.  $^{19}\text{F}$  NMR was measured at 376 MHz, and  $\text{CF}_3\text{COOH}$  (TFA) was used as an external standard.  $^{31}\text{P}$  NMR was measured at 100 MHz, and 85%  $\text{H}_3\text{PO}_4$  was used as an external standard. FAB-LRMS was taken using *m*-nitrobenzyl alcohol (*m*NBA) or glycinol (Gly) as the matrix. FAB-HRMS was taken using *m*NBA/PEG300 as the matrix. Flash column chromatography was performed with silica gel 60 (40-100  $\mu\text{m}$ ). The enantiomeric excesses (ees) were determined by chiral HPLC analysis. Solvents used in this paper were purchased and used as supplied. Other reagents were purified by usual methods. All DHIQs were prepared by oxidation of the corresponding secondary amines or using the classical Bischler-Napieralski reaction according to the reported procedure (See reference 18 in the main text). The obtained imines were stored in a refrigerator and passed through neutral alumina (eluent: hexane/ethyl acetate = 1/1) before use. The NMR data of DHIQs were reported in the Supporting Information of reference 16.

## (B) X-Ray Crystal Structure Analysis of 2a:

### X-Ray Crystal Structure Analysis of 2a · 3CDCl<sub>3</sub>

Crystal data:  $\text{C}_{48}\text{H}_{44}\text{F}_6\text{O}_{10}\text{P}_2\text{PdS}_2 \cdot 3\text{CDCl}_3$ ,  $FW = 1488.44$ , orthorhombic  $P2_12_12_1$ ,  $a = 12.0672(14)$ ,  $b = 15.2049(18)$ ,  $c = 33.606(4)$  Å,  $V = 6166.0(13)$  Å<sup>3</sup>;  $D_x = 1.603$  Mg m<sup>-3</sup>;  $Z = 4$ ;  $\mu(\text{Mo K}\alpha) = 0.882$  mm<sup>-1</sup>,  $T = 90$  K. Needle shaped yellow crystals were grown from a  $\text{CDCl}_3$  solution of **2a**. A single crystal with the dimensions of 0.57 x 0.08 x 0.05 mm was mounted on a MicroMount<sup>TM</sup> (MiTeGen, LLC) and set on a Rigaku AFC-8 diffractometer with a Saturn70 CCD detector. The diffraction data were collected using  $\text{MoK}\alpha$  radiation, which was monochromated by a multi-layered confocal mirror. The unit cell dimensions were determined using 18889 reflections with  $3.59 \leq 2\theta \leq 62.84^\circ$ . The diffraction data of 116652 within  $3.58 \leq 2\theta \leq 60.08^\circ$  were collected and merged to give 18030 unique reflections with the  $R_{\text{int}}$  of 0.0394. The structure was solved by a direct method and refined on  $F^2$  by a least-squares method by the programs SIR92<sup>1</sup> and SHELXL97,<sup>2</sup> respectively. The final  $R$  values against 17529 unique reflections ( $2\theta_{\text{max}} = 60.08^\circ$ ) with  $I > 2\sigma(I)$  are 0.0344 and 0.0757 for the  $R(F)$  and the  $wR(F^2)$ , respectively. The absolute structure of the crystal was determined by

anomalous dispersion effects ( $\chi = -0.020(13)$ ); the obtained configuration of the **2a** agrees with an *R*-configuration of the dm-segphos ligand.

### (C) X-Ray Crystal Structure Analysis of **23**:

Crystal data:  $C_{16}H_{19}NO_5$ ,  $FW = 305.32$ , monoclinic  $P2_1$ ,  $a = 8.675(2)$ ,  $b = 15.232(4)$ ,  $c = 11.263(3)$  Å,  $\beta = 99.373(4)^\circ$ ,  $V = 1468.5(6)$  Å<sup>3</sup>;  $D_x = 1.381$  Mg m<sup>-3</sup>;  $Z = 4$ ;  $\mu(\text{Mo K}\alpha) = 0.103$  mm<sup>-1</sup>,  $T = 100$  K. Plate shaped colorless crystals were grown from a methanol solution of **23**. A single crystal with the dimensions of 0.42 x 0.21 x 0.03 mm was mounted on a MicroMount<sup>TM</sup> (MiTeGen, LLC) and set on a Rigaku AFC-8 diffractometer with a Saturn70 CCD detector. The diffraction data were collected using MoK $\alpha$  radiation, which was monochromated by a multi-layered confocal mirror. The unit cell dimensions were determined using 5690 reflections with  $3.66 \leq 2\theta \leq 65.03^\circ$ . The diffraction data of 8921 within  $3.66 \leq 2\theta \leq 60.14^\circ$  were collected. The data were merged, including Friedel pairs, to give 8921 unique reflections with the  $R_{\text{int}}$  of 0.0403. The structure was solved by a direct method and refined on  $F^2$  by a least-squares method by the programs SIR2004<sup>3</sup> and SHELXL97,<sup>2</sup> respectively. The imaginary part of the anomalous dispersion term of each atom was set to zero on the refinements. The final  $R$  values against 3455 unique reflections ( $2\theta_{\text{max}} = 60.14^\circ$ ) with  $I > 2\sigma(I)$  are 0.0489 and 0.0970 for the  $R(F)$  and the  $wR(F^2)$ , respectively.

(1) Altomare, A.; Cascarano, G.; Giacovazzo, C.; Guagliardi, A.; Burla, M. C.; Polidori, G.; Camalli, M. *J. Appl. Cryst.* **1994**, 27, 435.

(2) SHELXL97: Sheldrick, G. M., University of Göttingen, Germany, 1997.

(3) Burla, M. C.; Caliendo, R.; Camalli, M.; Carrozzini, B.; Cascarano, G. L.; De Caro, L.; Giacovazzo, C.; Polidori, G.; Spagna, R., *J. Appl. Cryst.* **2005**, 38, 381-388.

# (D) NMR spectra of the Pd complexes

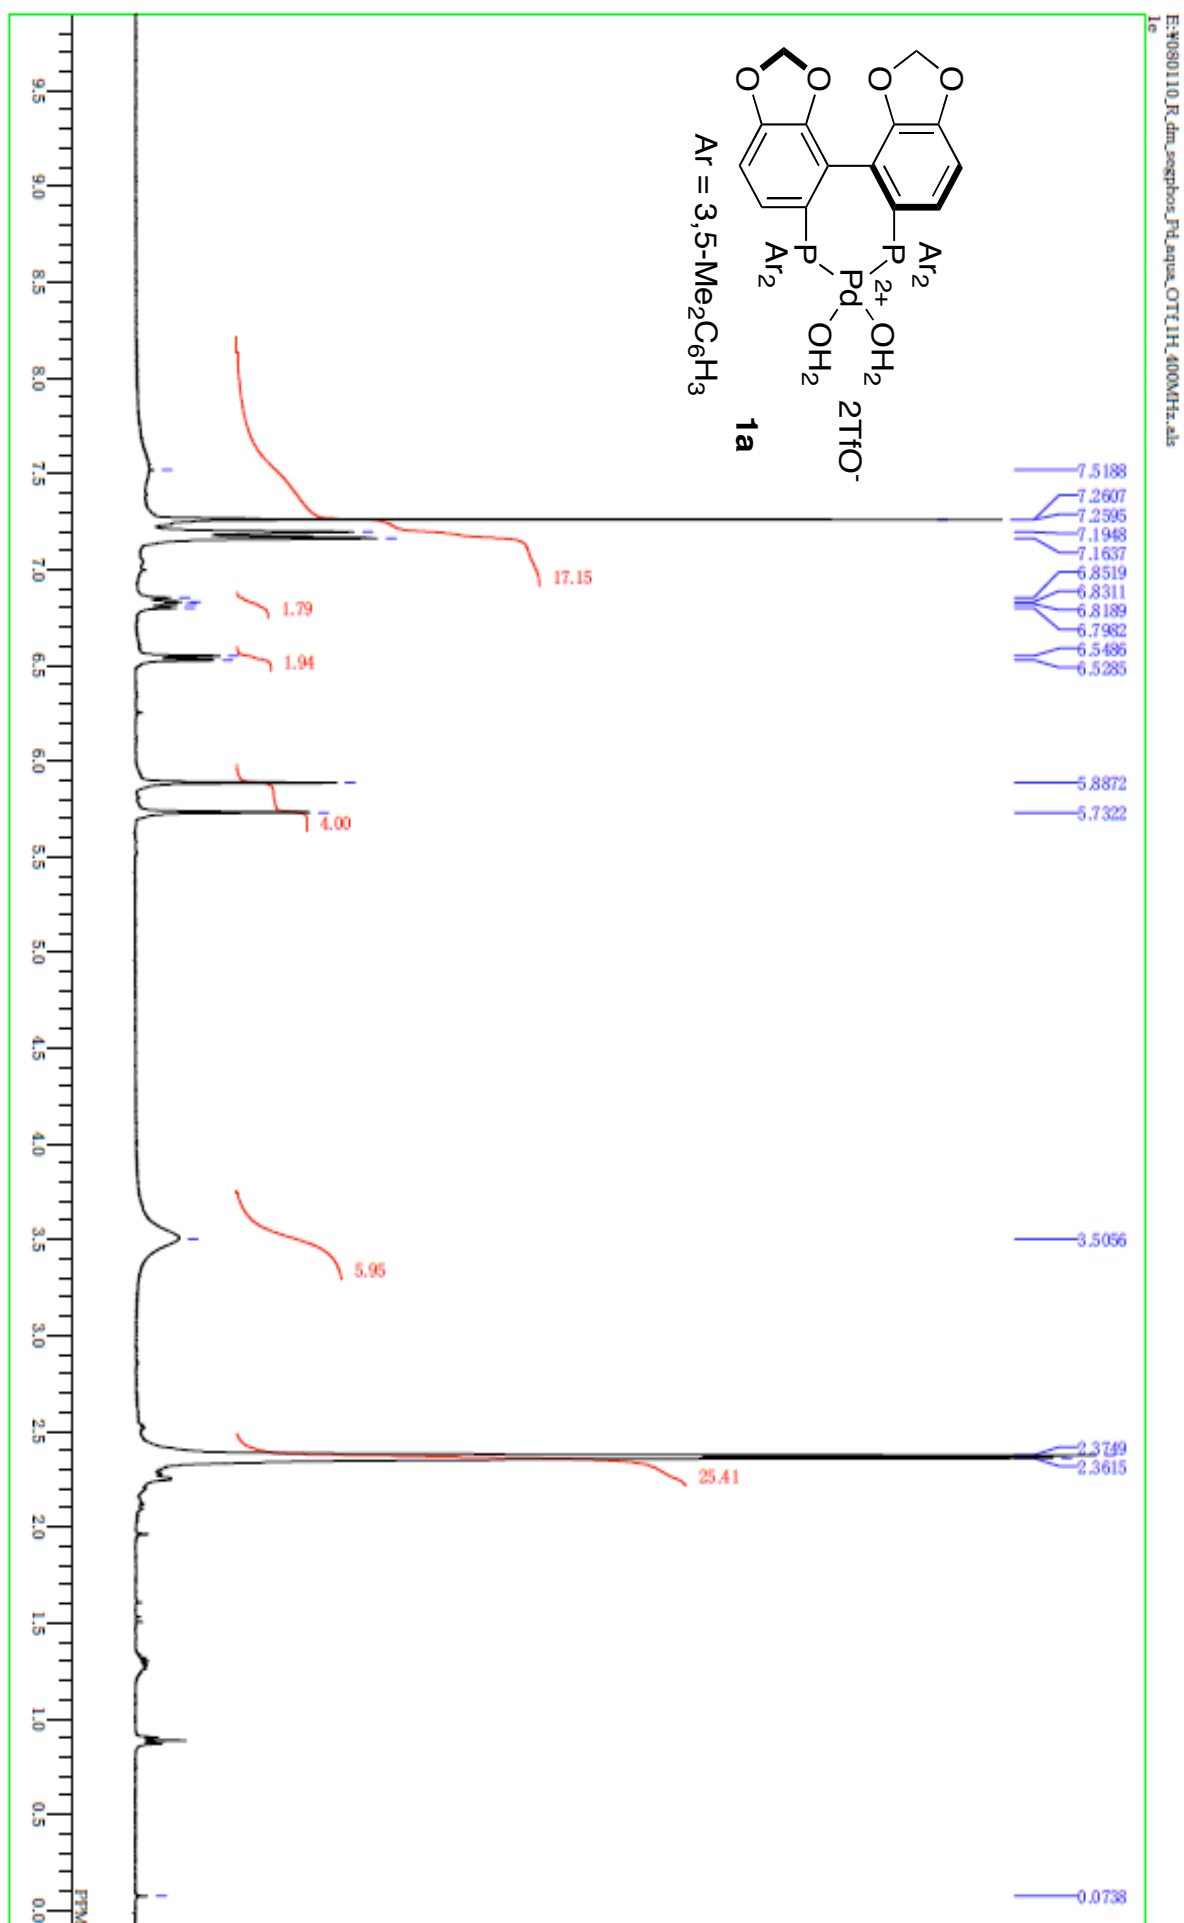

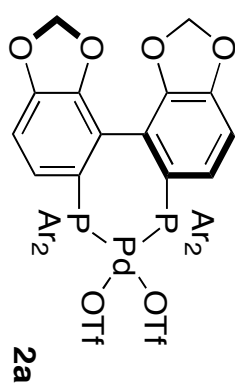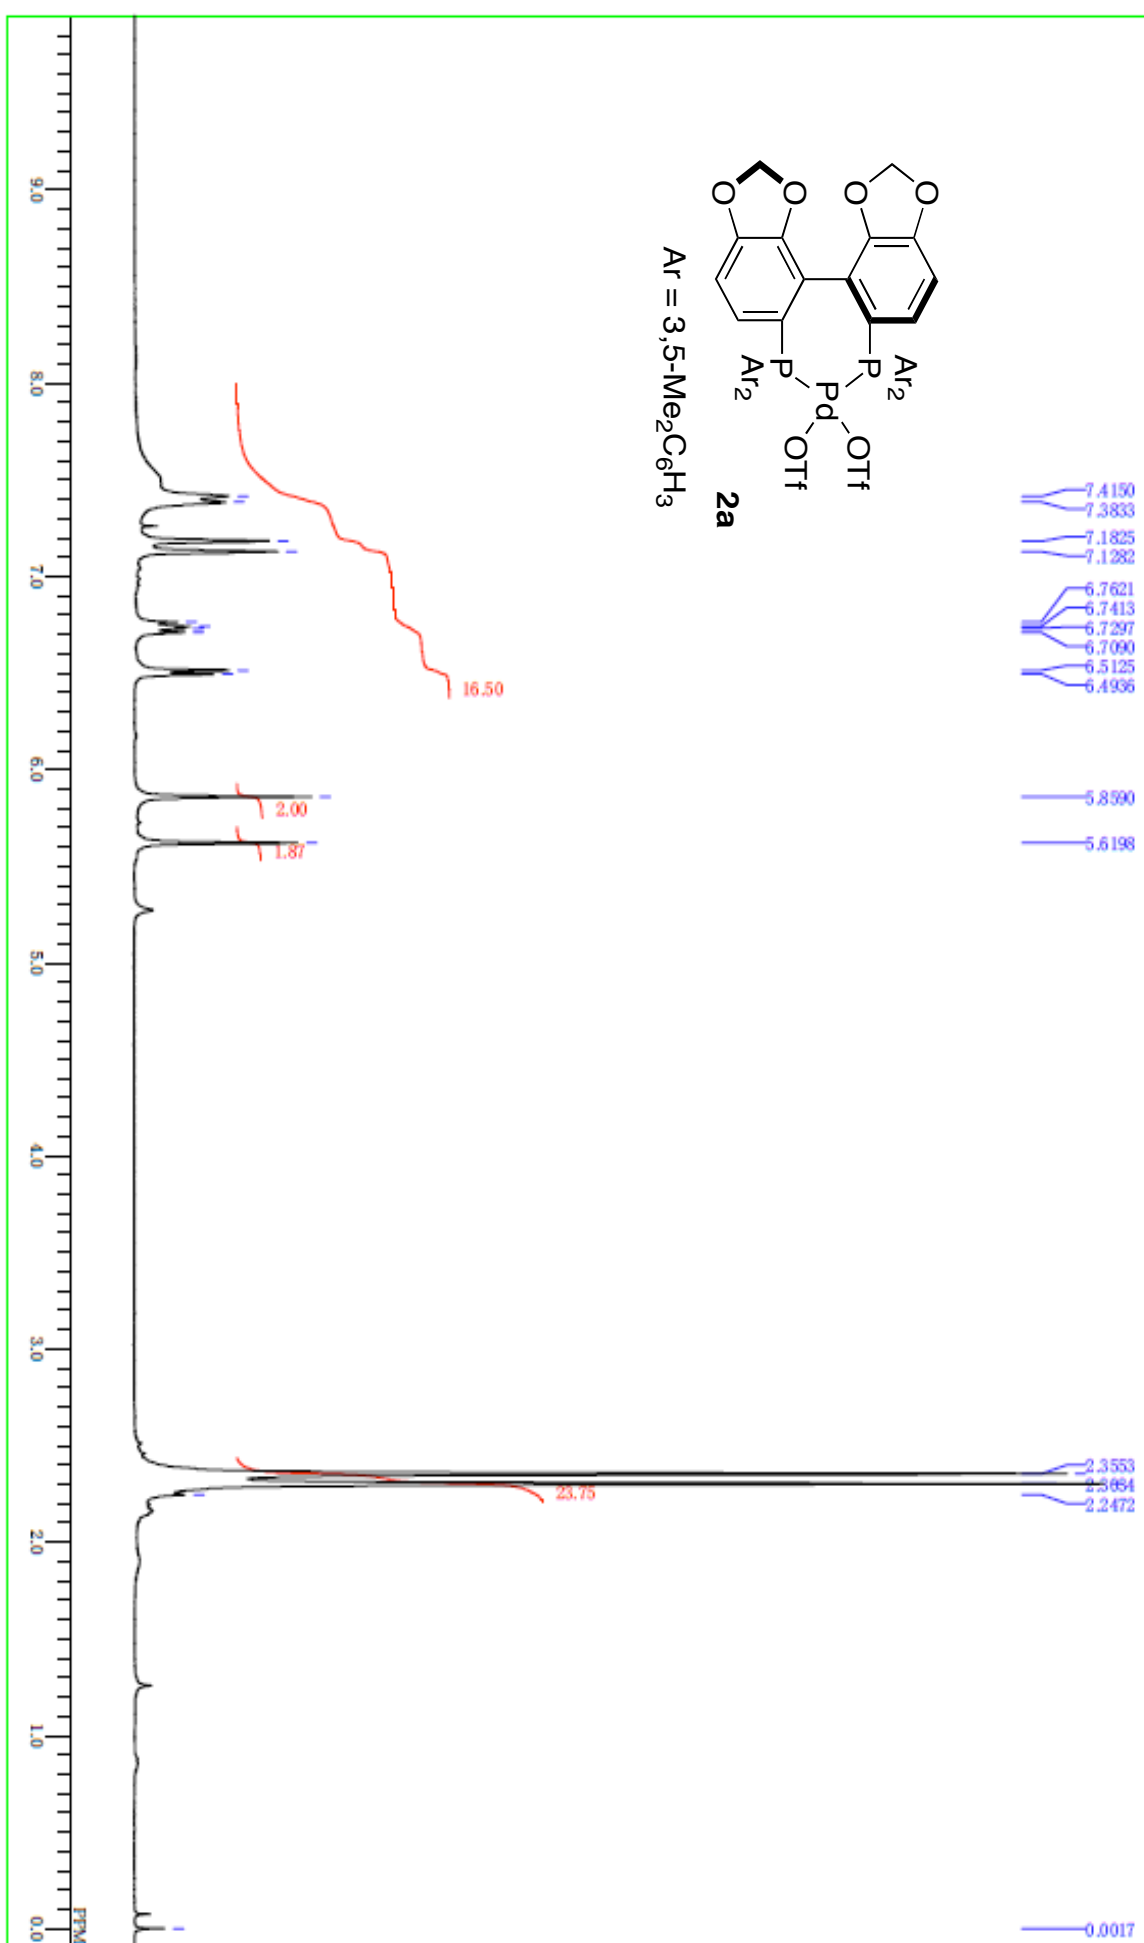

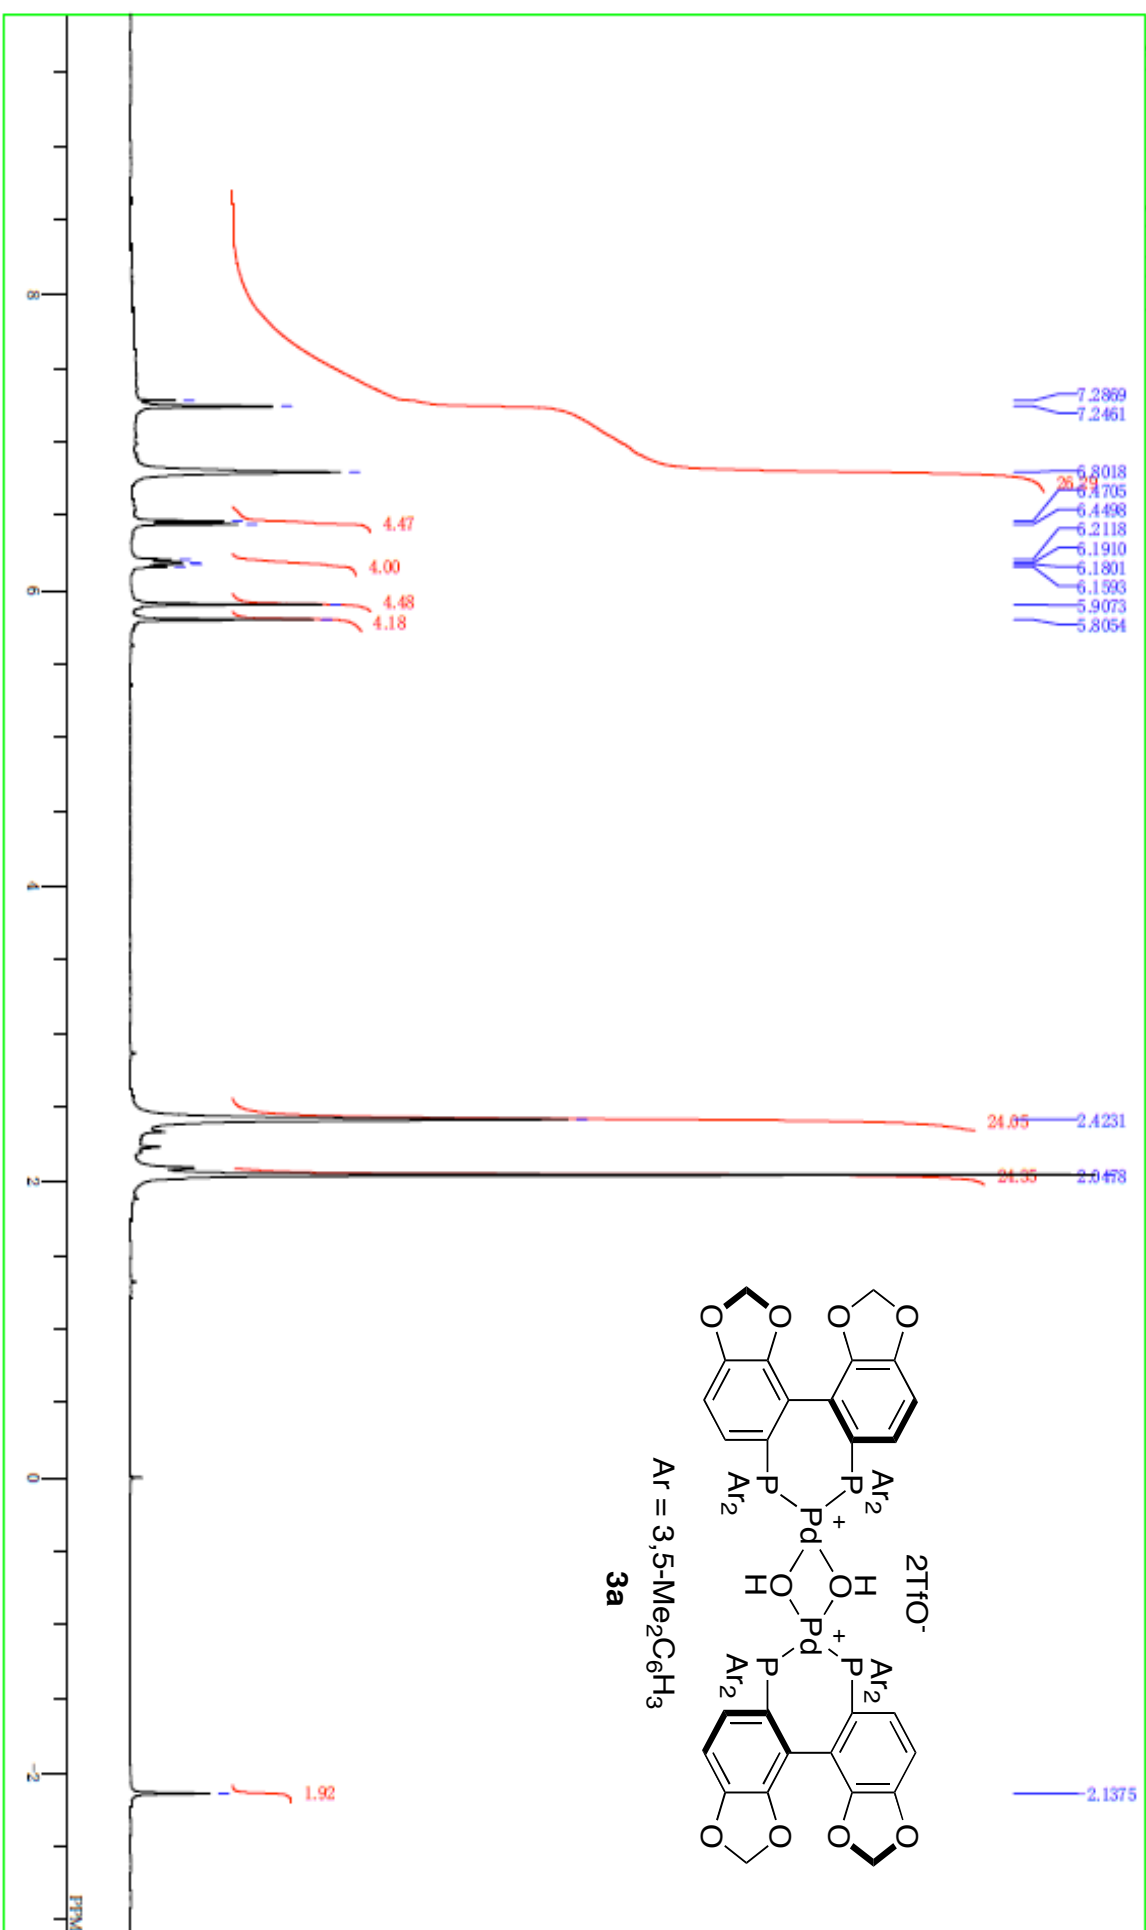

# (E) NMR spectra of the new compounds

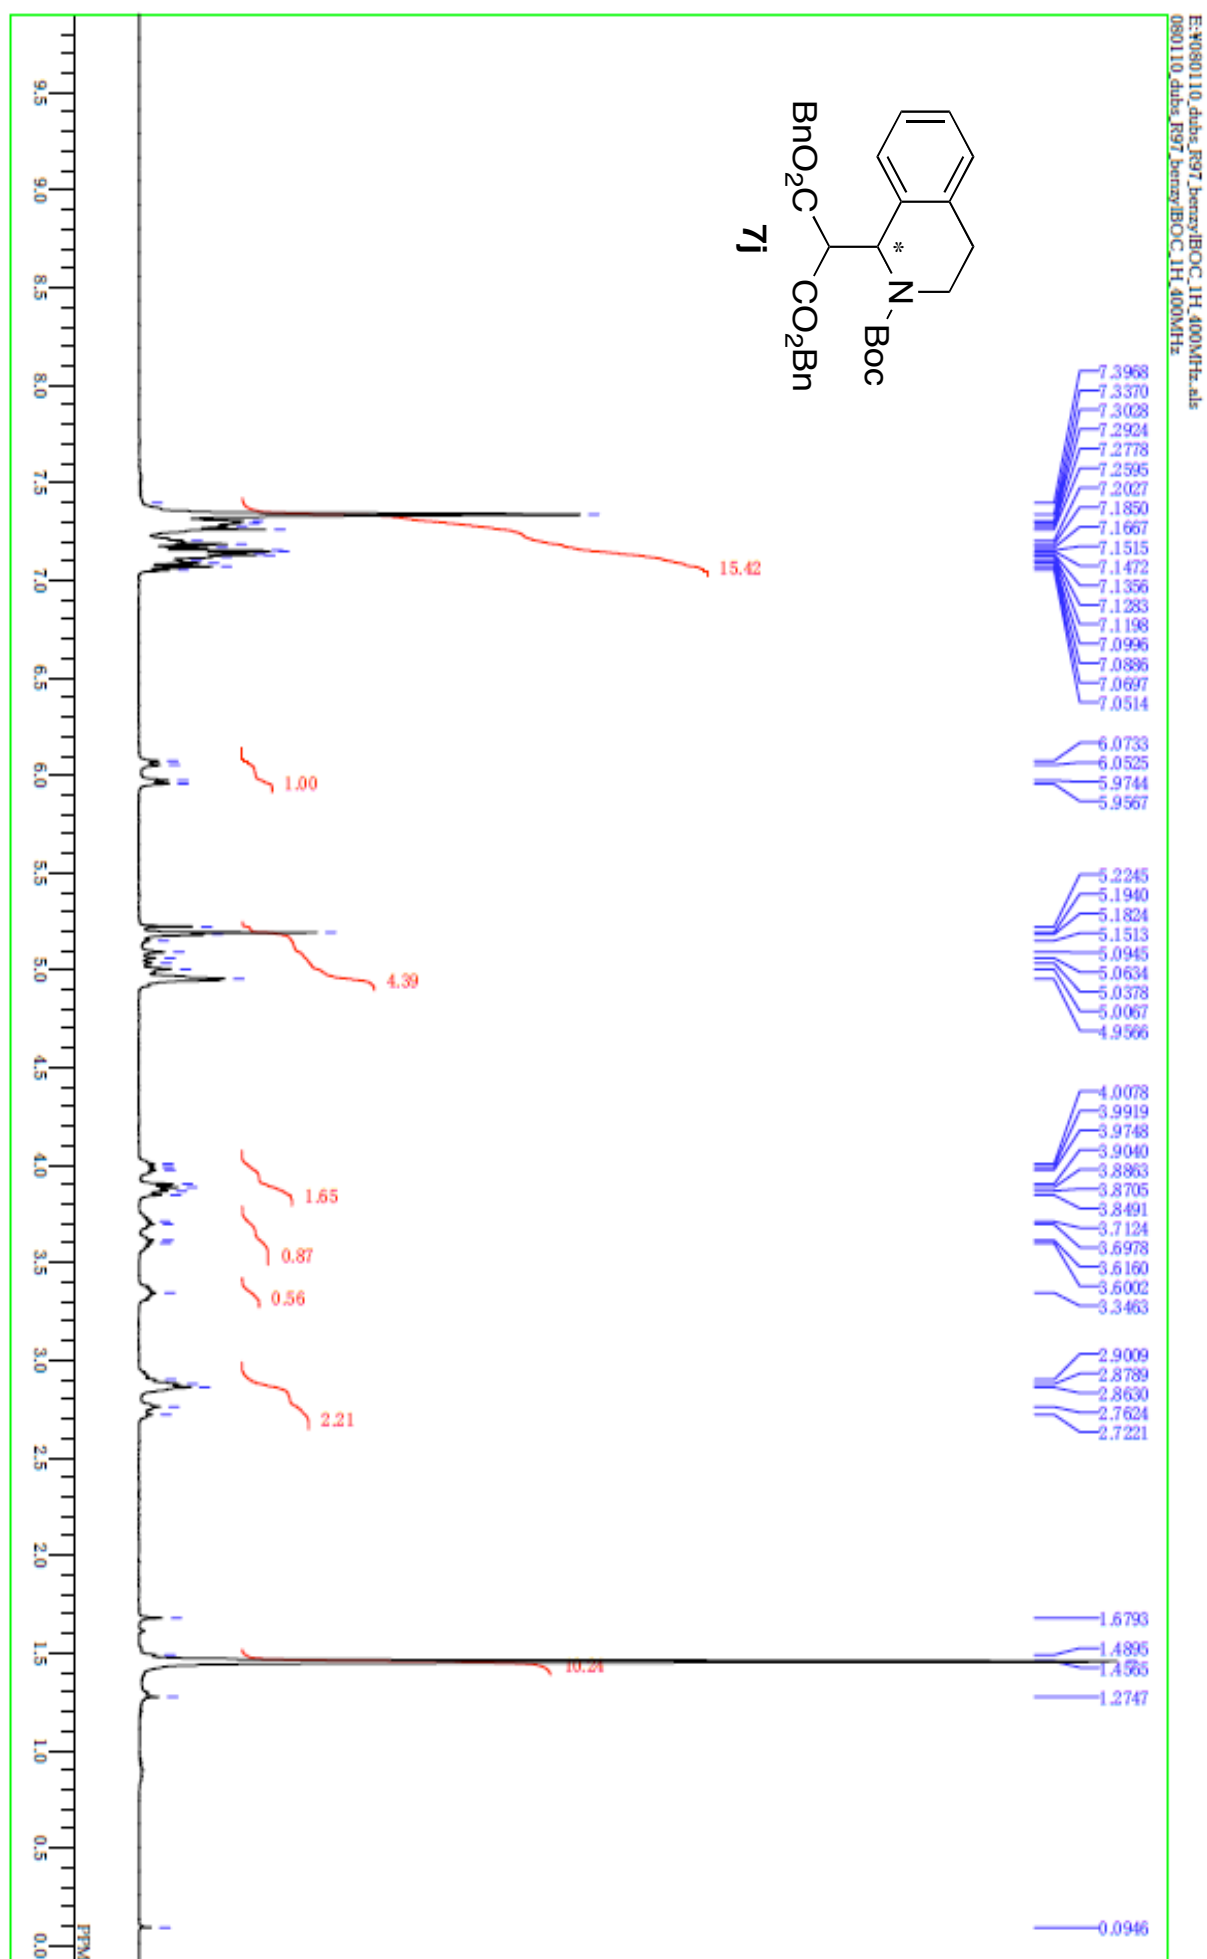

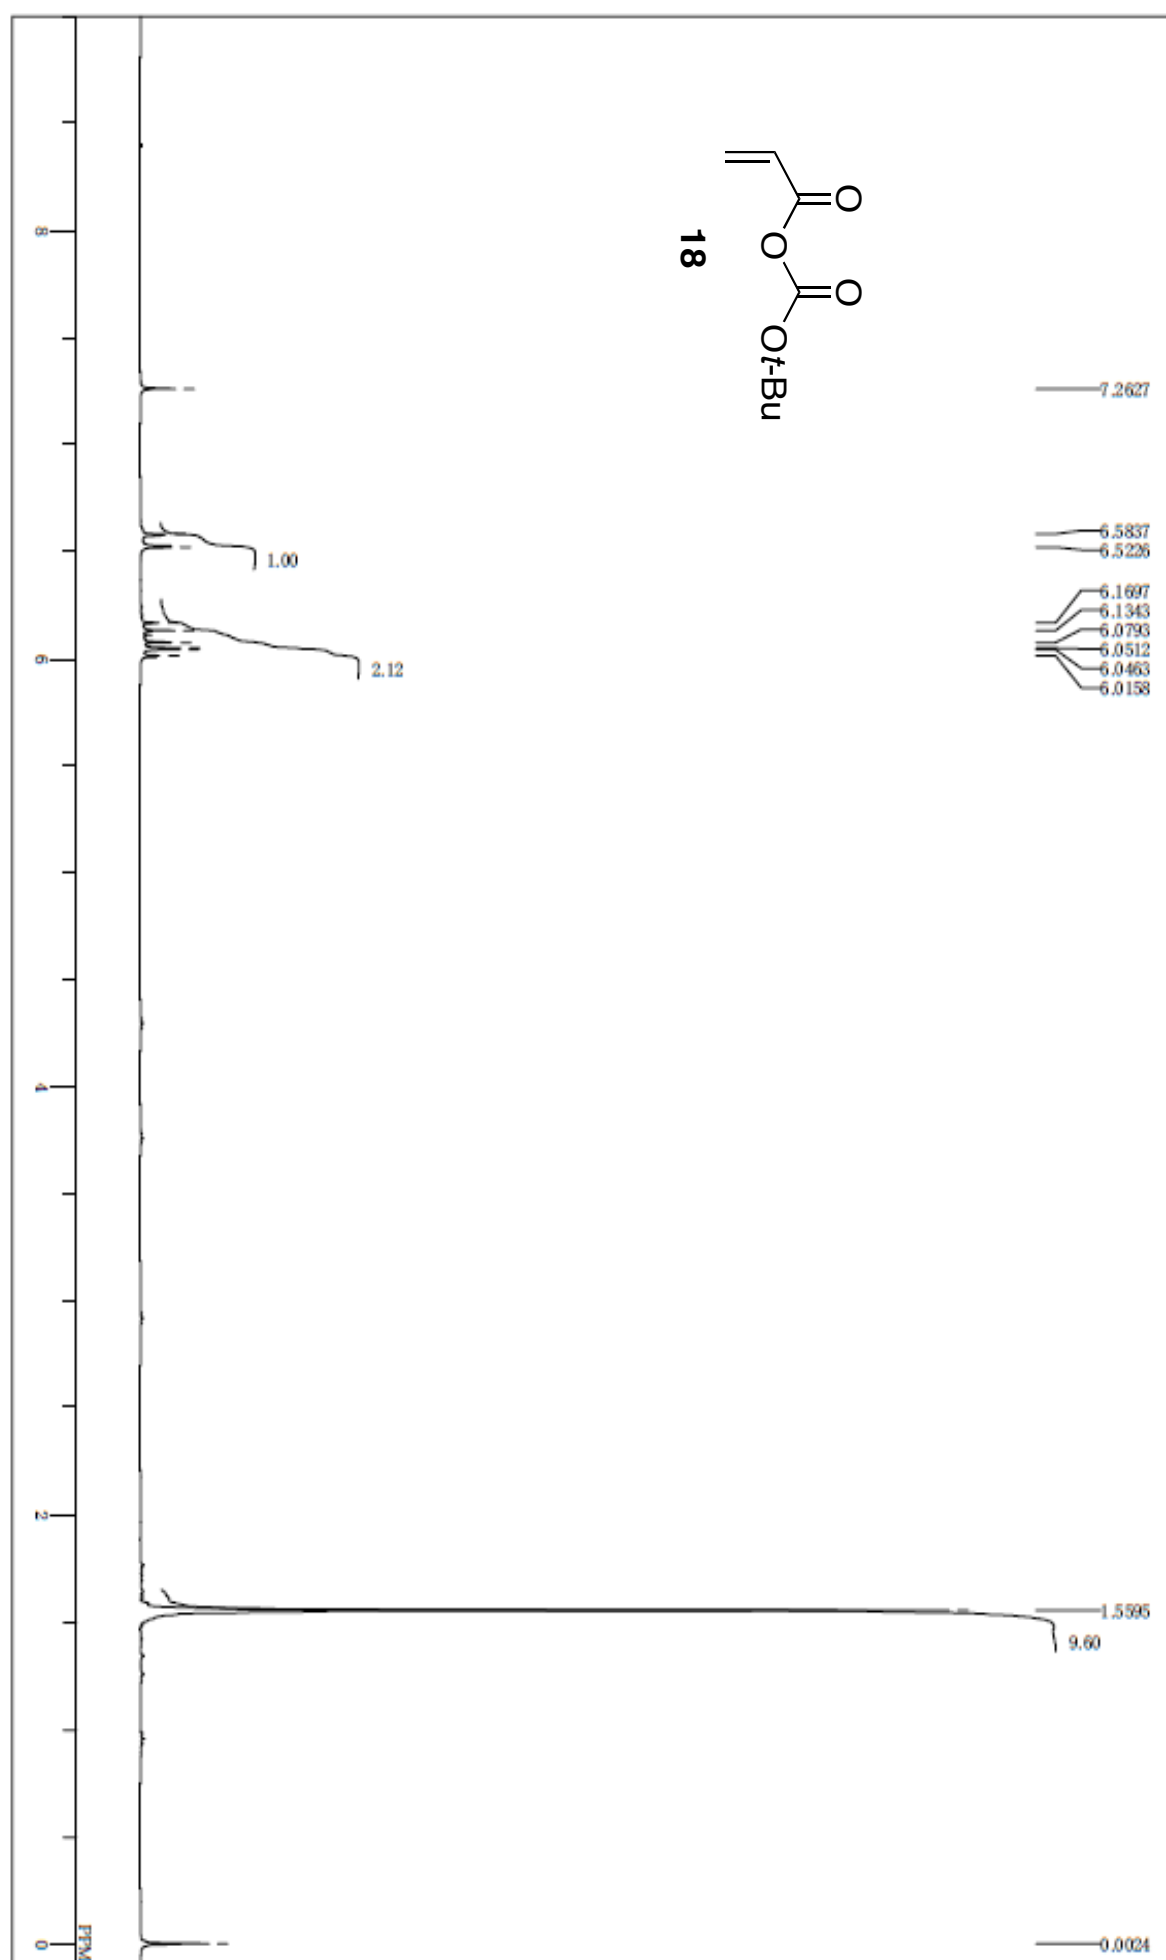



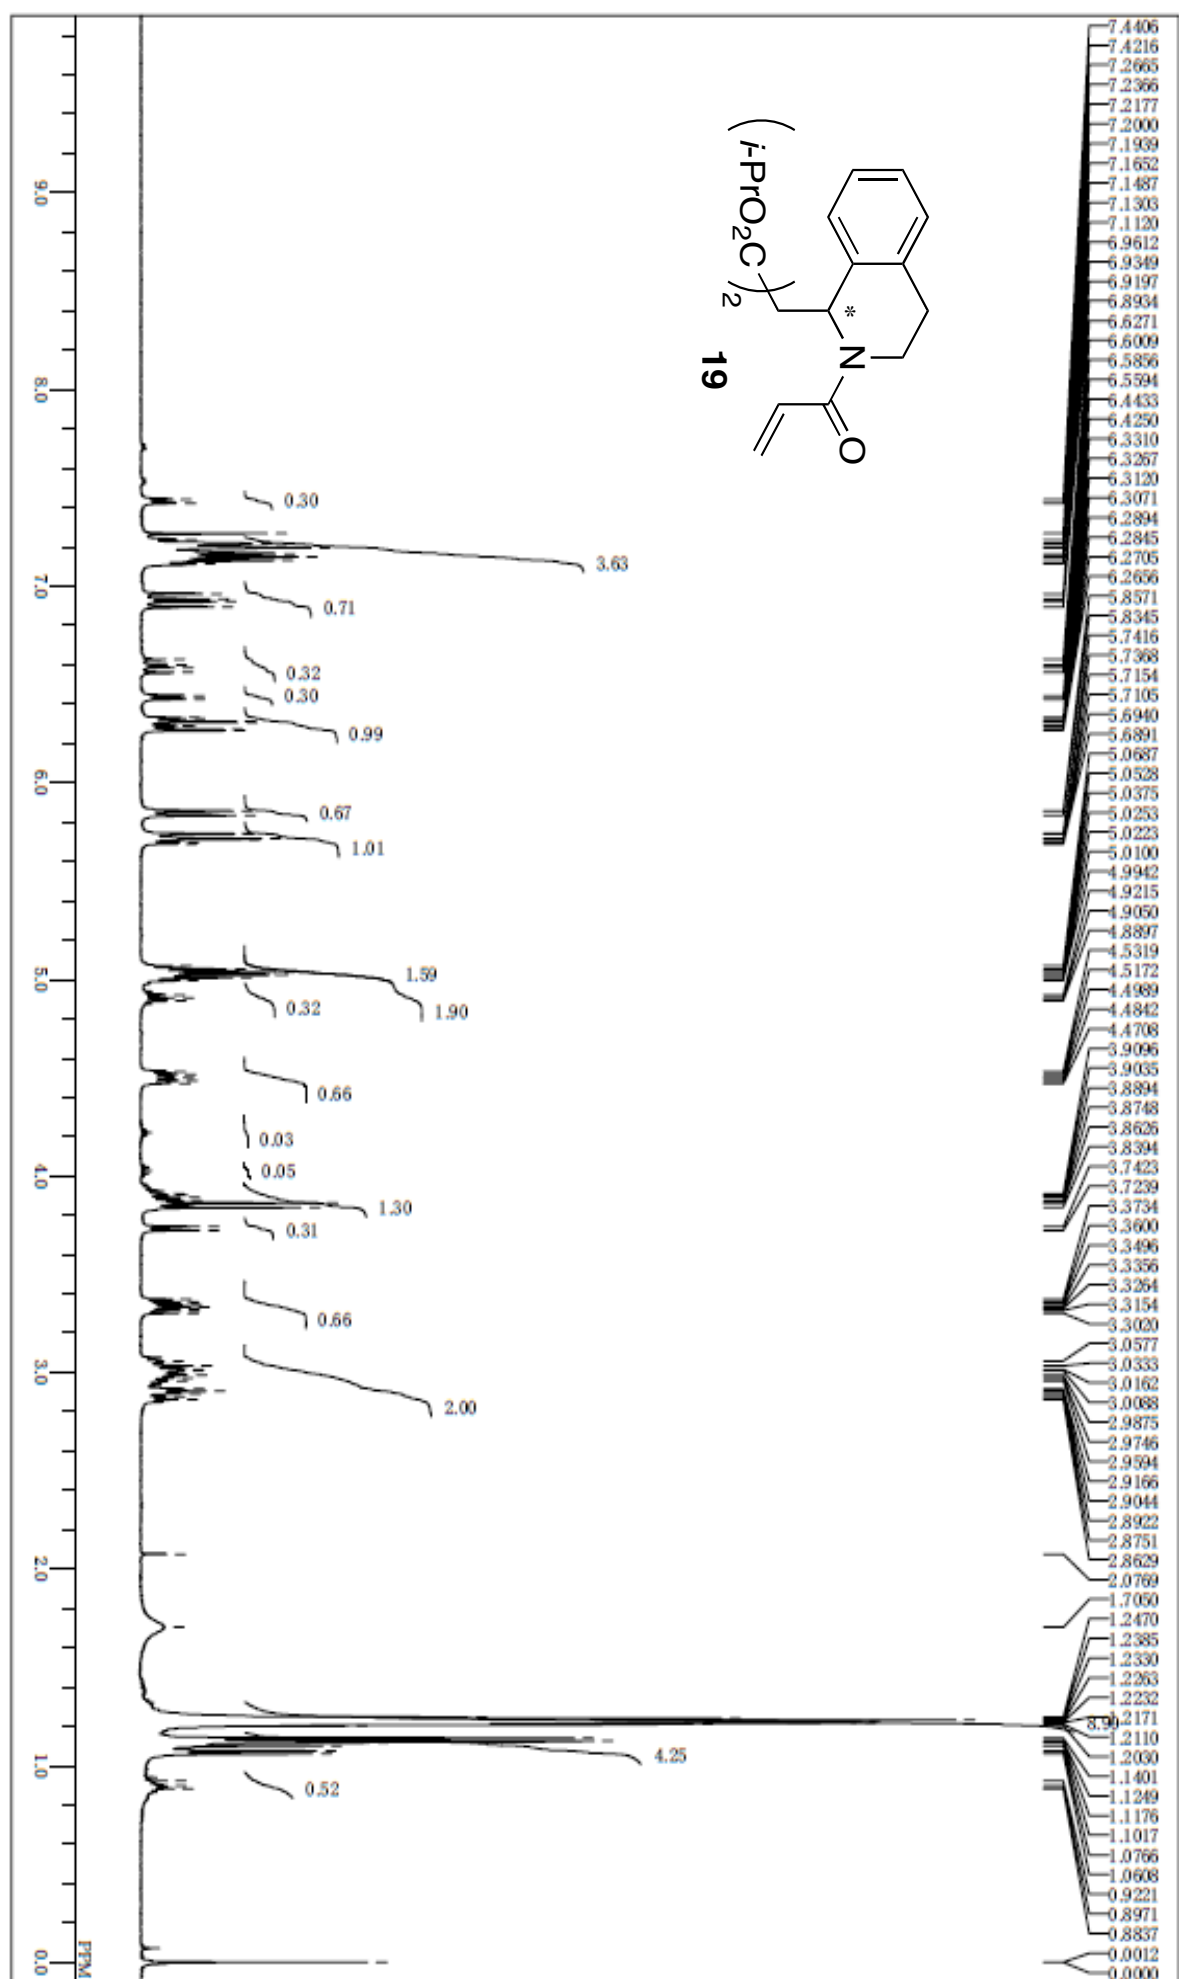

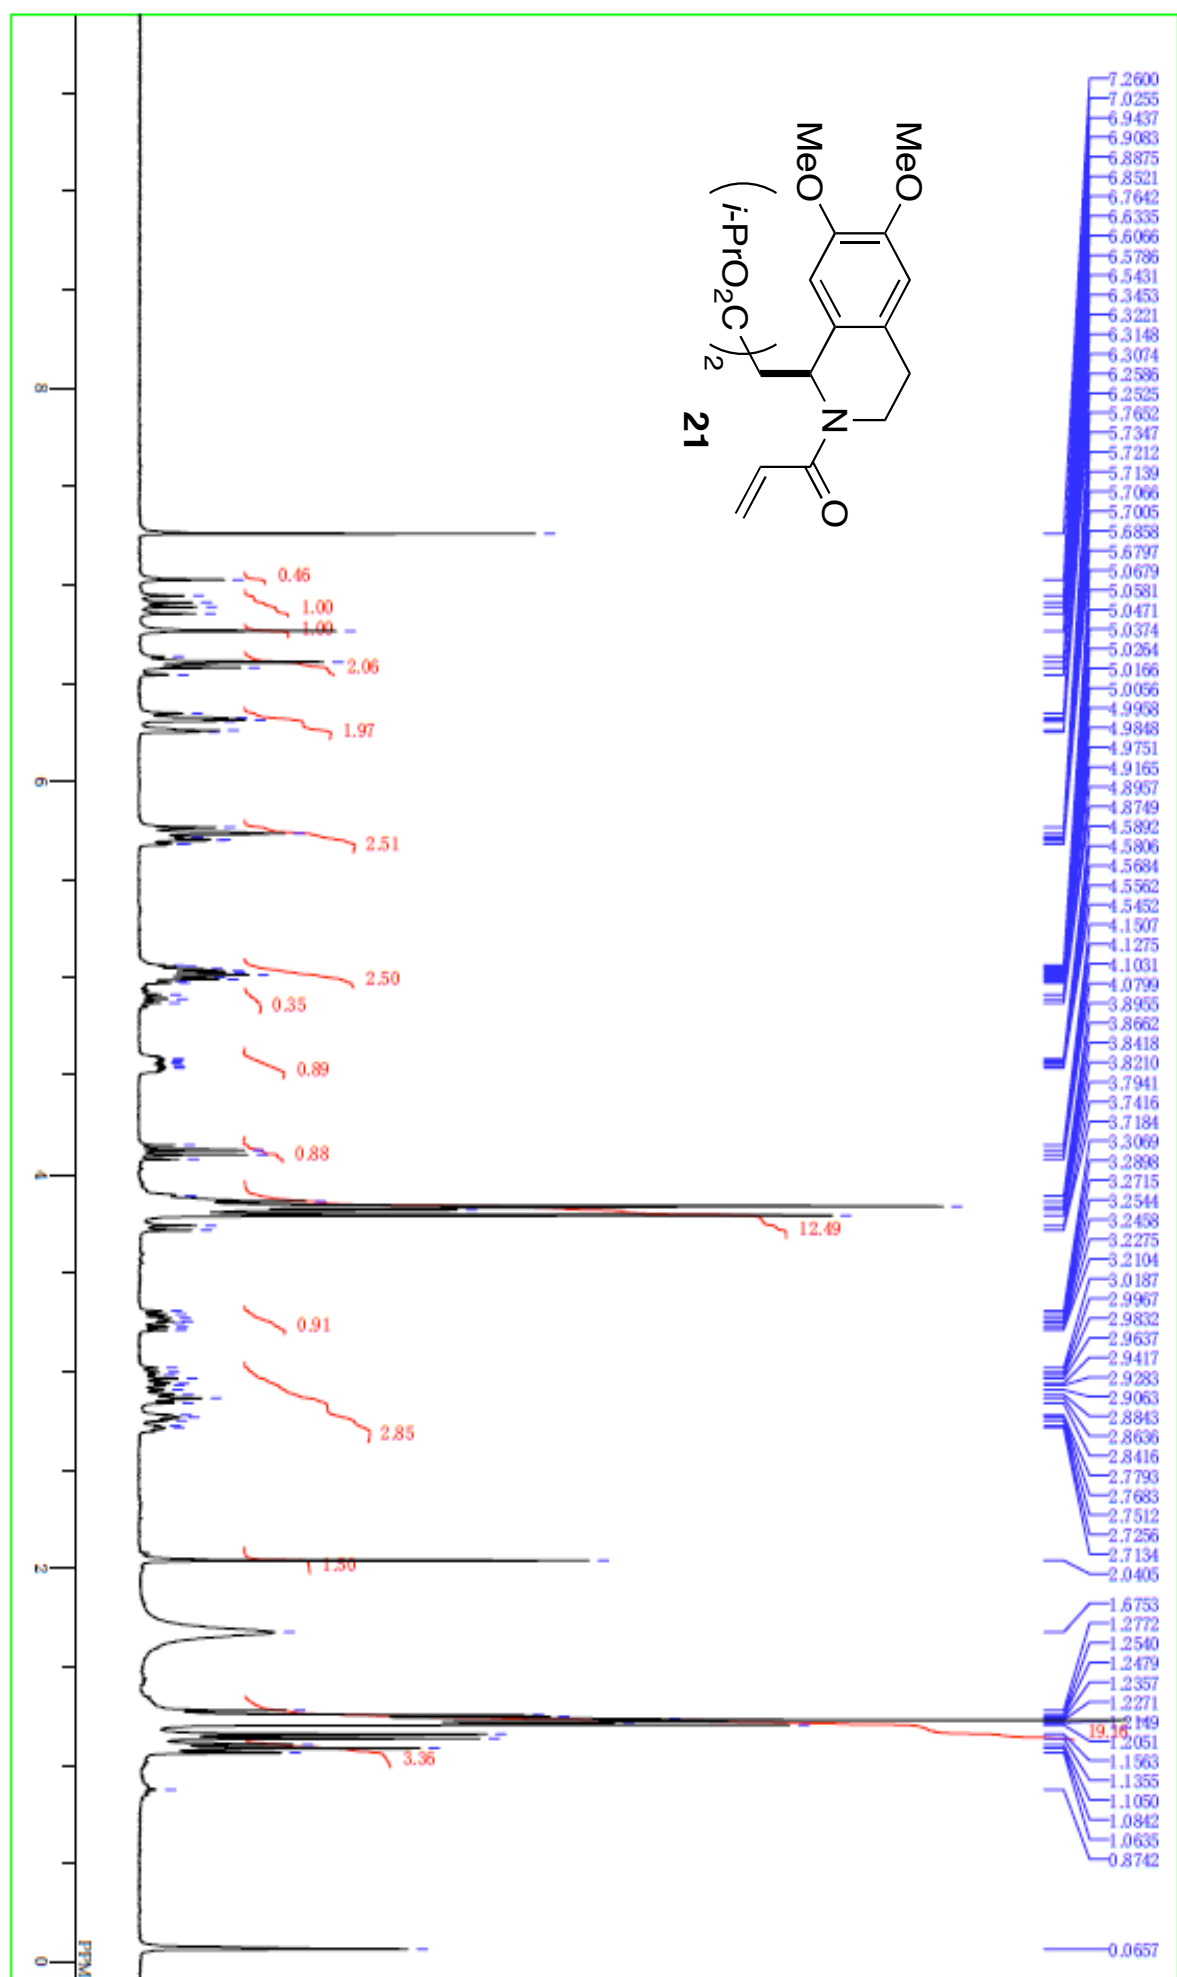

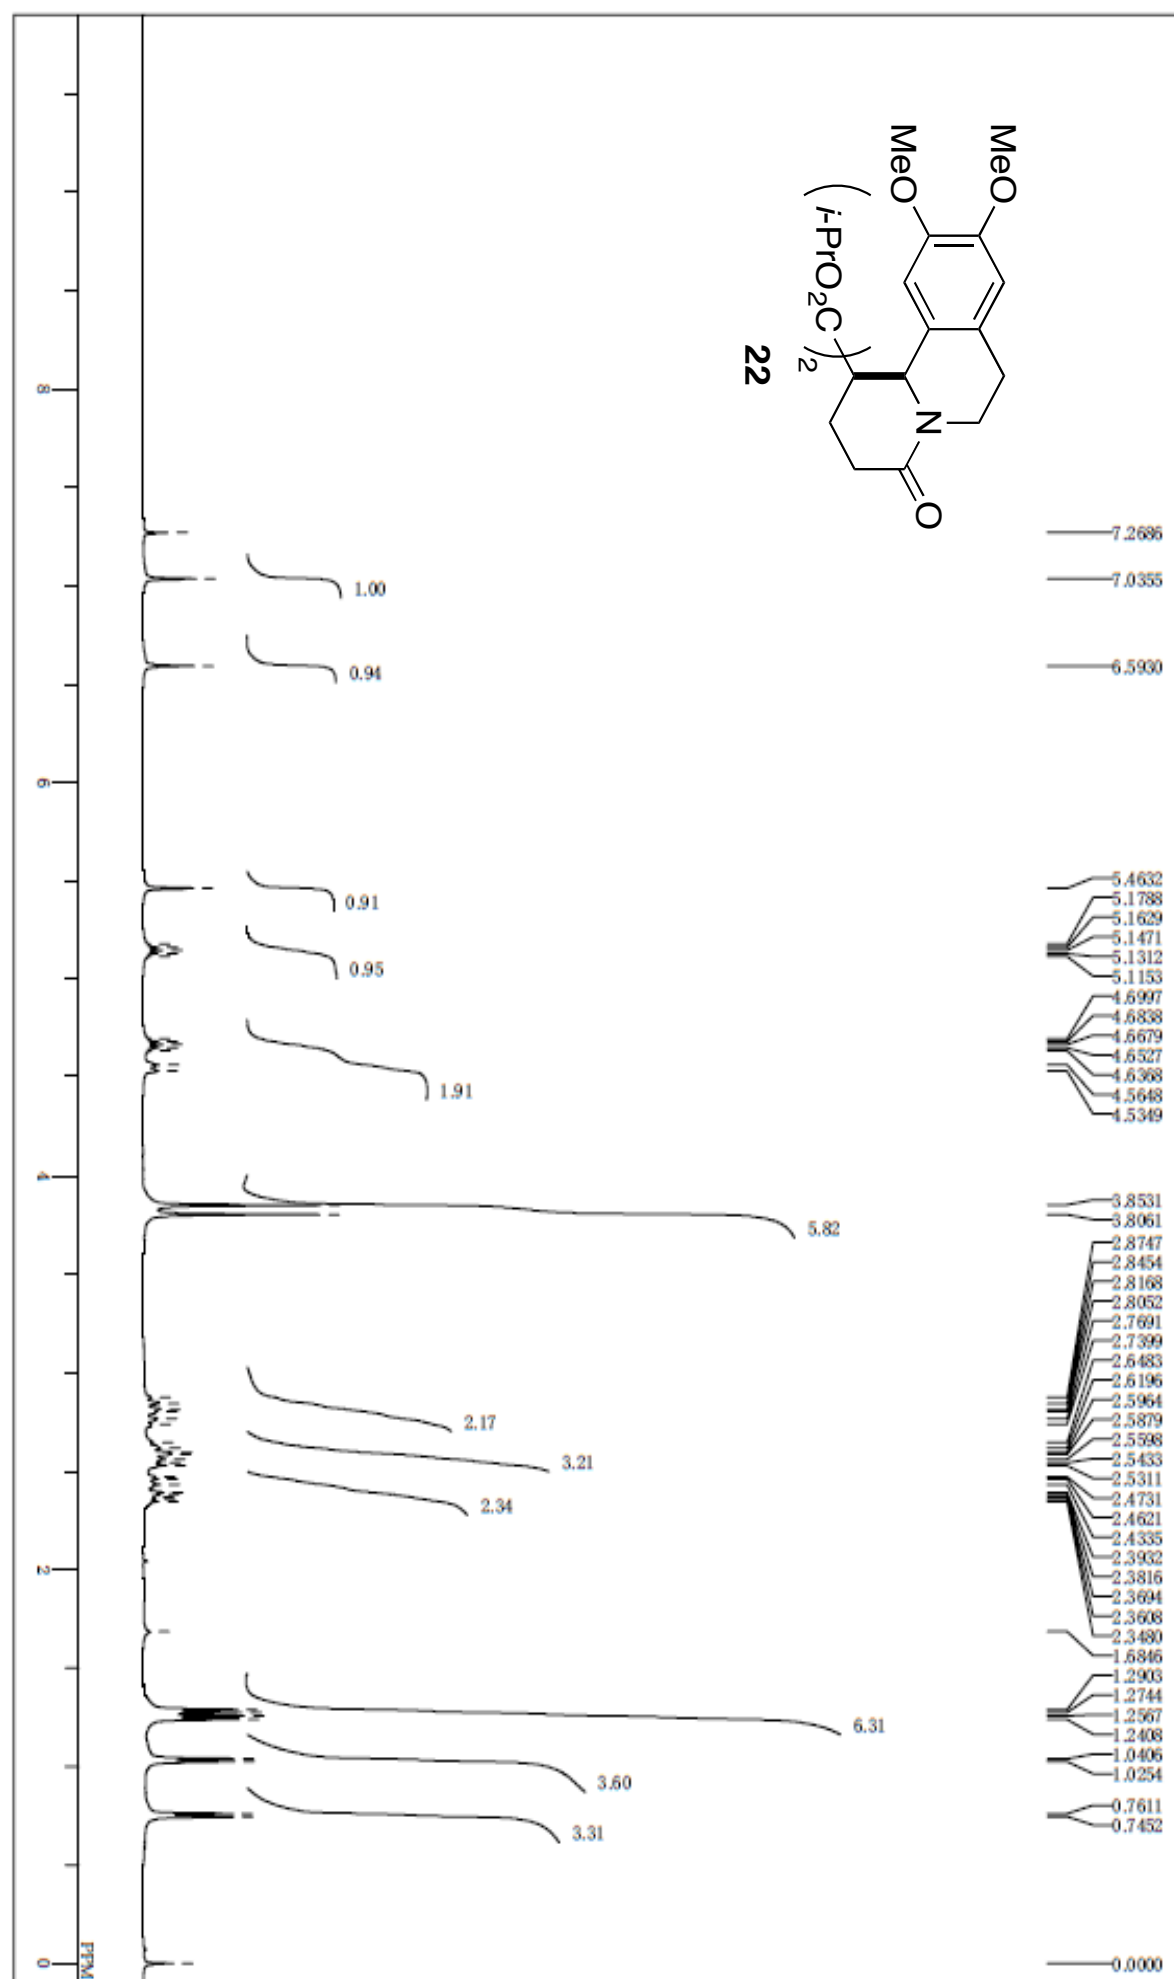

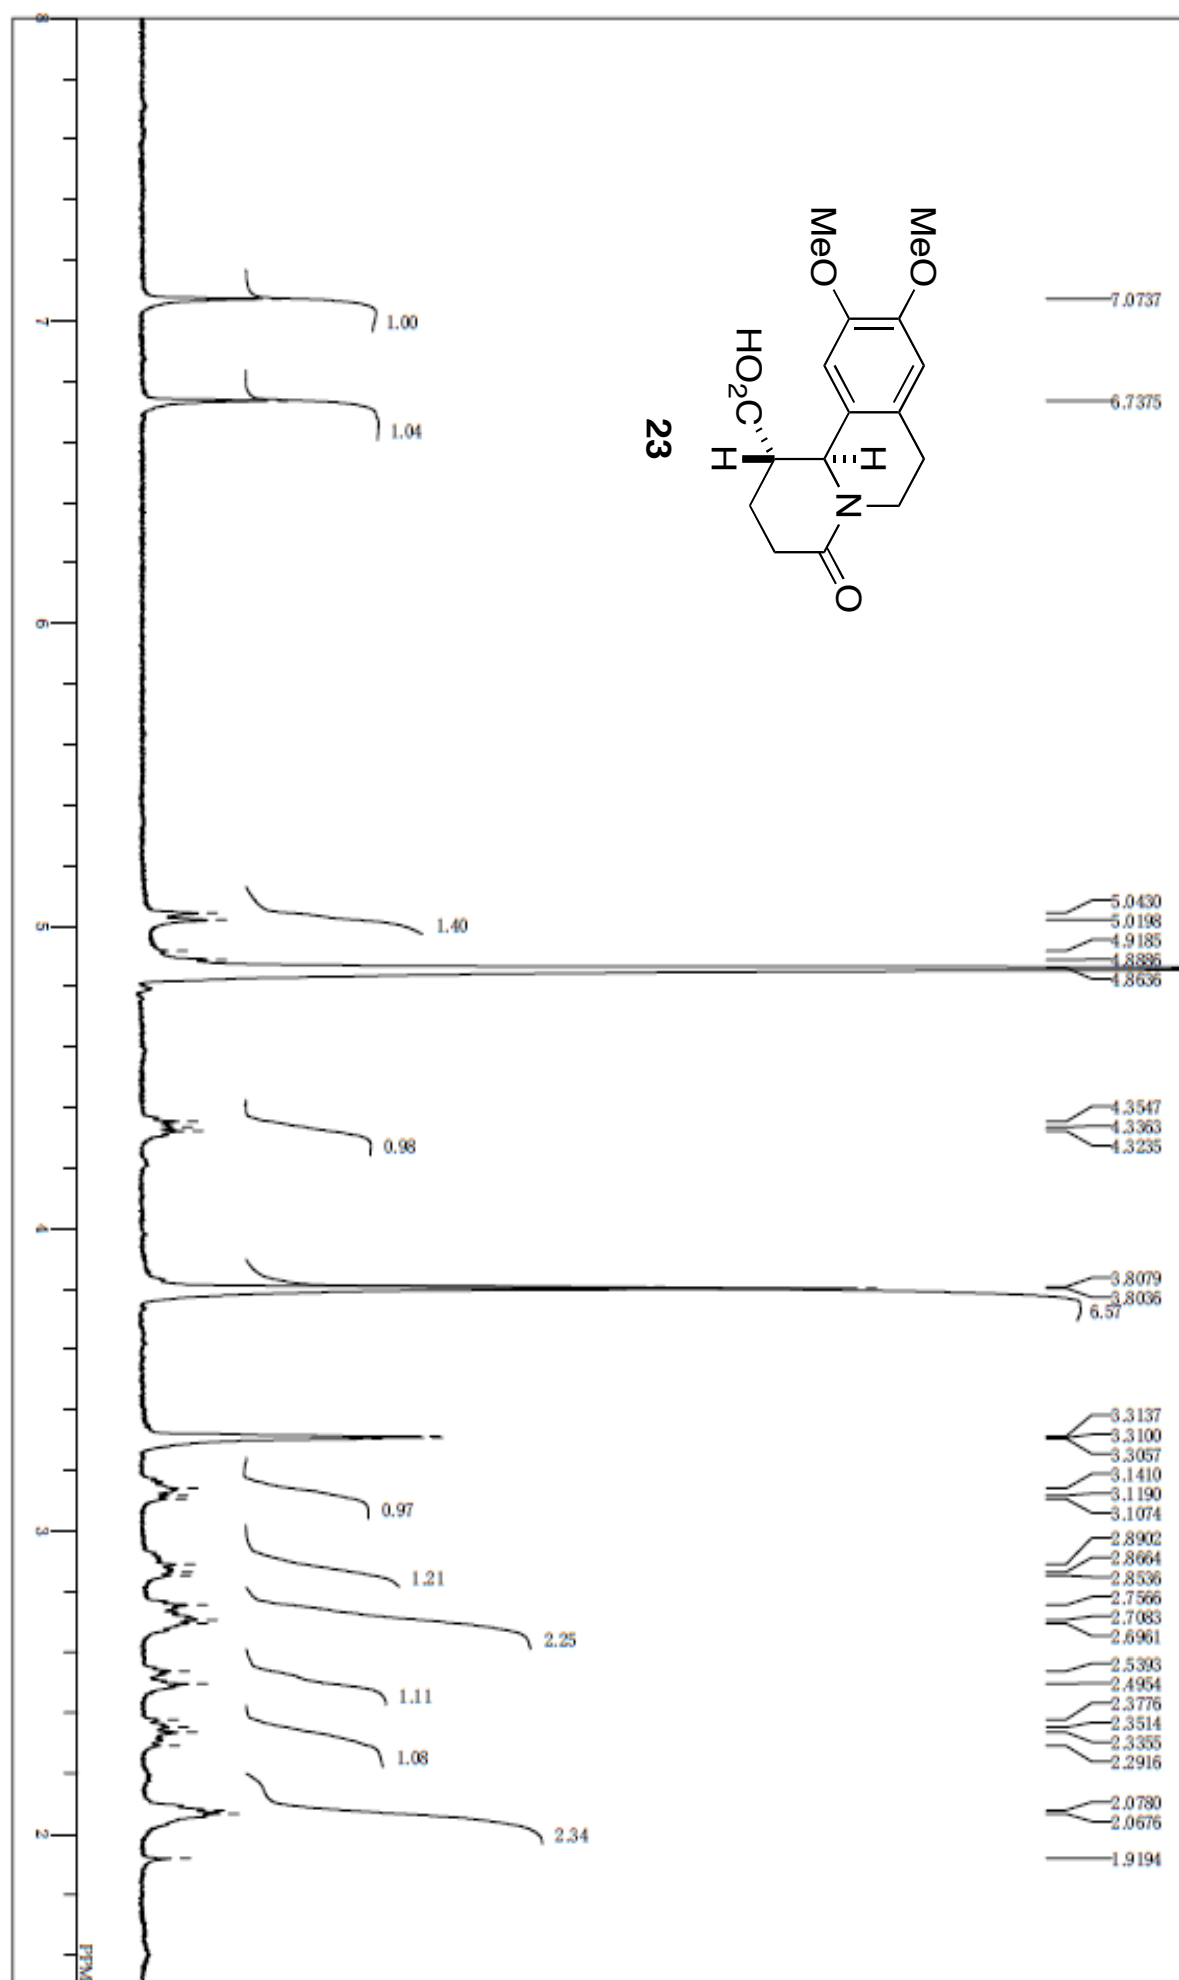

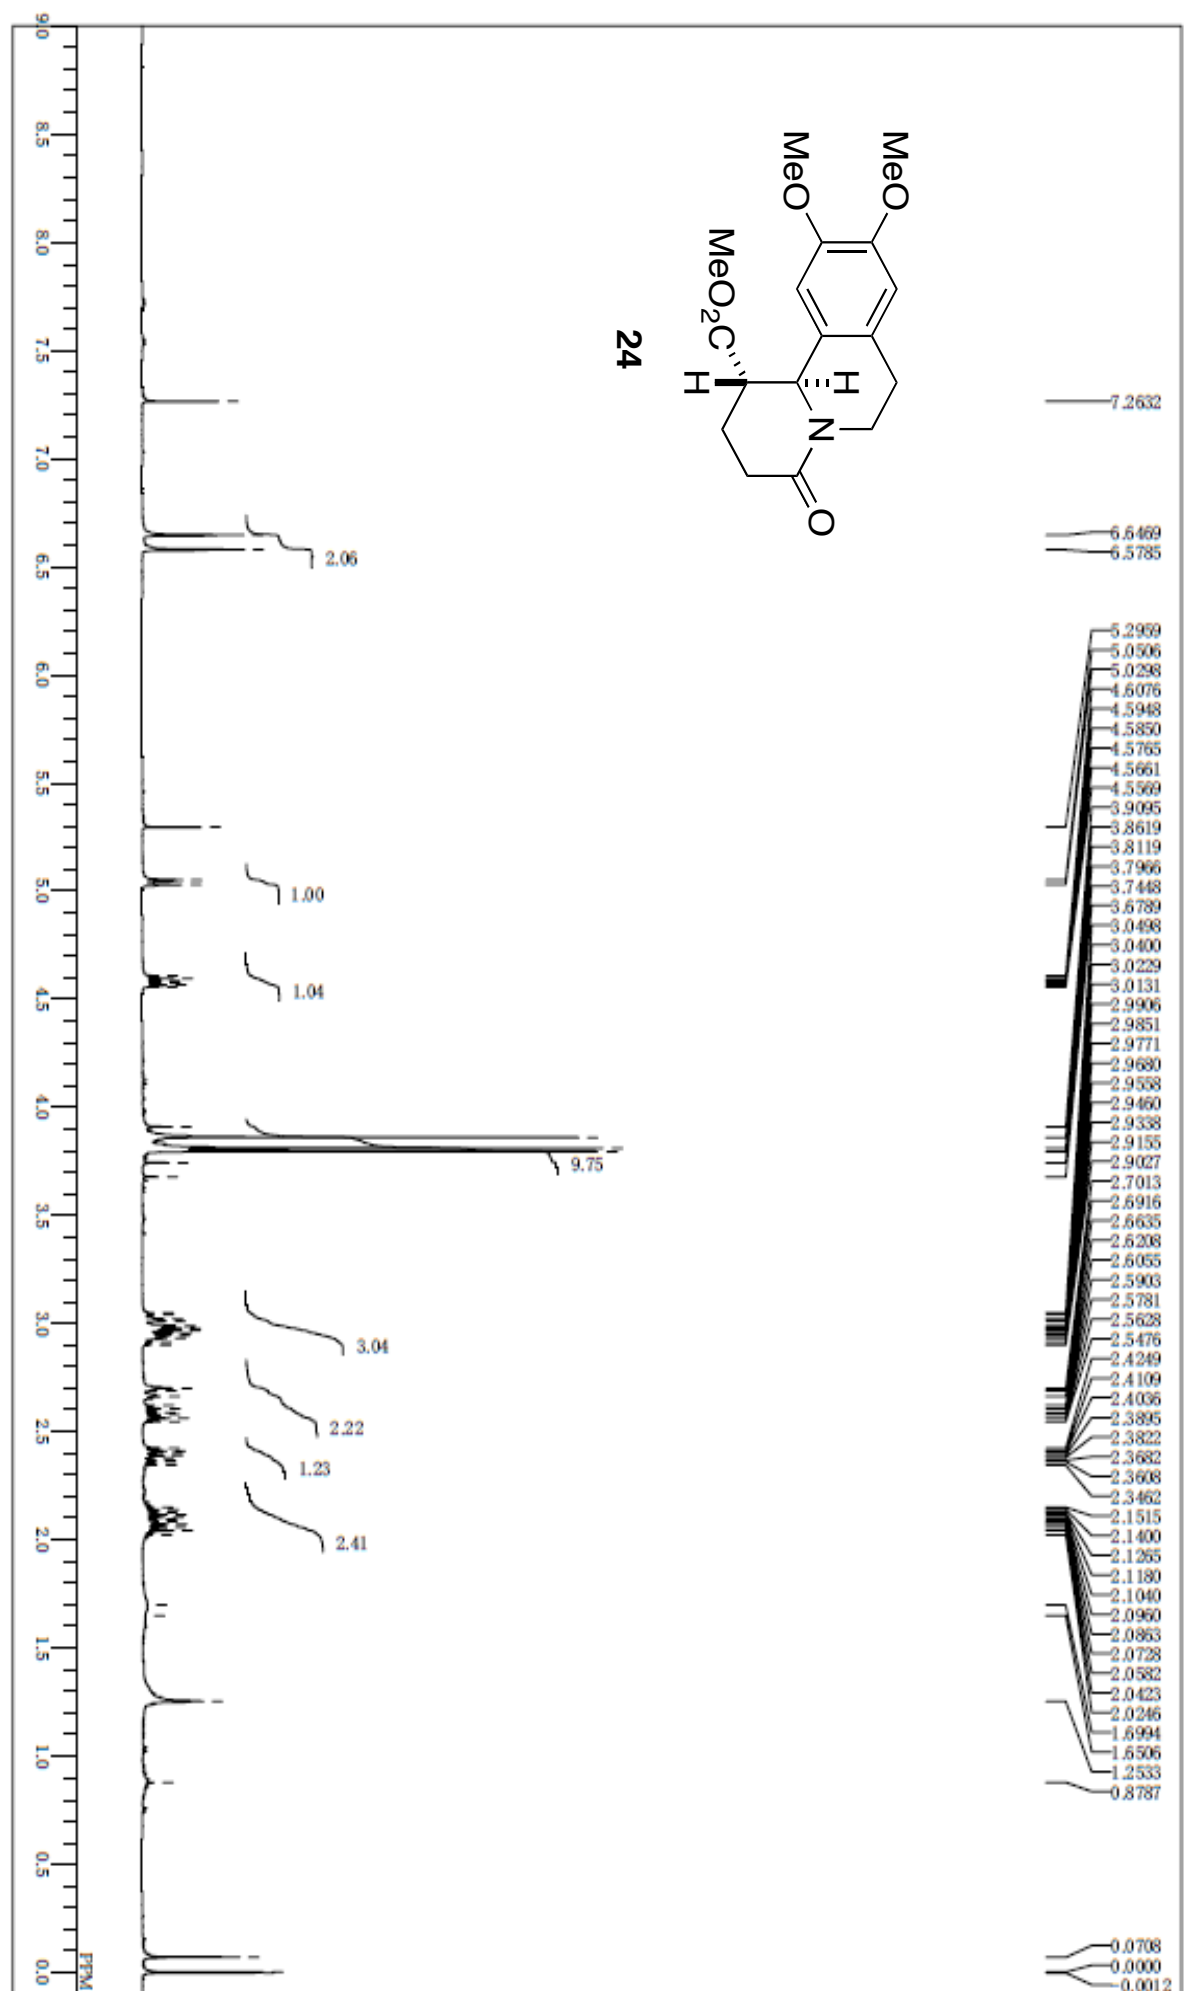

Supplement: Supplementary file 1 [file 4622635]
